# Supplementary material for: Composition Characterization of Fatty Acid Zinc Salts by Chromatographic and NMR Spectroscopic Analyses on Their Fatty Acid Methyl Esters
Source: Hindawi journal article supplement (doi:10.1155/2019/7594767), 2019-12-23
Supplement: f1 [file 7594767.f1.pdf]

## Journal of Analytical Methods in Chemistry

# Composition Characterization of Fatty Acid Zinc Salts by Chromatographic and NMR Spectroscopic Analyses on their Fatty Acid Methyl Esters

Kwang Seo Park, Yun Ju Kim, and Eun Kyung Choe

Regulatory Chemical Analysis Laboratory, Korea Institute of Industrial Technology, Ansan 15588, Republic of Korea.

Correspondence should be addressed to Eun Kyung Choe; ekchoe@kitech.re.kr

### Supplementary Materials

The supplementary data consist of the following Tables S1-S3 and Picture S1 :

Table S1. Retention times and concentrations of 37 FAMES in the standard solution.

Table S2. Calculation of total fatty acids from GC-MS analysis on FAMES using an internal standard method (an example with FAMES from industrial chemical B)

Table S3.  $^1\text{H}$  NMR data of (a) the hydrolysed products and (b) the methyl esterified products from fatty acid zinc salts.

Picture S1: Pictures of white precipitation formed in a clear aqueous solution of aqueous work-up solution in 2.3.3.1 upon increase of alkalinity suggesting the formation of  $\text{Zn}(\text{OH})_2$ . The same phenomenon was observed in the aqueous work-up solution in 2.3.1.

Table S1: Retention times and concentrations of 37 FAMES in the standard solution.

| Peak No. | RT (min) | Substance Name                                      | Carbon : Double Bond | CAS No.    | Certified Conc. (%) | U <sub>CRM</sub> (%) |
|----------|----------|-----------------------------------------------------|----------------------|------------|---------------------|----------------------|
| 1        | 12.21    | Methyl butyrate                                     | C4:0                 | 623-42-7   | 4.00                | ± 0.021              |
| 2        | 14.30    | Methyl hexanoate                                    | C6:0                 | 106-70-7   | 4.00                | ± 0.021              |
| 3        | 17.91    | Methyl octadecanoate                                | C8:0                 | 111-11-5   | 4.00                | ± 0.021              |
| 4        | 22.84    | Methyl decanoate                                    | C10:0                | 110-42-9   | 4.00                | ± 0.021              |
| 5        | 25.51    | Methyl undecanoate                                  | C11:0                | 1731-86-8  | 2.00                | ± 0.011              |
| 6        | 28.20    | Methyl laurate                                      | C12:0                | 111-82-0   | 4.00                | ± 0.021              |
| 7        | 30.82    | Methyl tridecanoate                                 | C13:0                | 1731-88-0  | 2.00                | ± 0.011              |
| 8        | 33.36    | Methyl myristate                                    | C14:0                | 124-10-7   | 4.00                | ± 0.021              |
| 9        | 35.39    | Methyl myristoleate                                 | C14:1                | 56219-06-8 | 2.00                | ± 0.011              |
| 10       | 35.78    | Methyl pentadecanoate                               | C15:0                | 7132-64-1  | 2.00                | ± 0.011              |
| 11       | 37.76    | Methyl <i>cis</i> -10-pentadecenoate                | C15:1                | 90176-52-6 | 2.00                | ± 0.011              |
| 12       | 38.13    | Methyl palmitate                                    | C16:0                | 112-39-0   | 6.00                | ± 0.032              |
| 13       | 39.72    | Methyl <i>cis</i> -9-hexadecenoate                  | C16:1                | 1120-25-8  | 2.00                | ± 0.011              |
| 14       | 40.31    | Methyl heptadecanoate                               | C17:0                | 1731-92-6  | 2.00                | ± 0.011              |
| 15       | 41.89    | Methyl <i>cis</i> -10-heptadecenoate                | C17:1                | 75190-82-8 | 2.00                | ± 0.011              |
| 16       | 42.46    | Methyl stearate                                     | C18:0                | 112-61-8   | 4.00                | ± 0.021              |
| 17       | 43.39    | Methyl <i>trans</i> -9-eladate                      | C18:1n9t             | 1937-62-8  | 2.00                | ± 0.011              |
| 18       | 43.80    | Methyl <i>cis</i> -9-oleate                         | C18:1n9c             | 112-62-9   | 4.00                | ± 0.021              |
| 19       | 44.87    | Methyl linolelaidate                                | C18:2n6t             | 2566-97-4  | 2.00                | ± 0.011              |
| 20       | 45.75    | Methyl linoleate                                    | C18:2n6c*            | 112-63-0   | 2.00                | ± 0.011              |
| 21       | 46.44    | Methyl arachidate                                   | C20:0                | 1120-28-1  | 4.00                | ± 0.021              |
| 22       | 47.20    | Methyl $\gamma$ -linolenate                         | C18:3n6              | 16326-32-2 | 2.00                | ± 0.011              |
| 23       | 47.66    | Methyl <i>cis</i> -11-eicosenoate                   | C20:1n9              | 2390-09-02 | 2.00                | ± 0.011              |
| 24       | 47.97    | Methyl linolenate                                   | C18:3n3              | 301-00-8   | 2.00                | ± 0.011              |
| 25       | 48.28    | Methyl heneicosanoate                               | C21:0                | 6064-90-0  | 2.00                | ± 0.011              |
| 26       | 49.52    | Methyl <i>cis</i> -11,14-eicosadienoate             | C20:2                | 2463-02-07 | 2.00                | ± 0.011              |
| 27       | 50.11    | Methyl behenate                                     | C22:0                | 929-77-1   | 4.00                | ± 0.021              |
| 28       | 50.87    | Methyl <i>cis</i> -8,11,14-eicosatrienoate          | C20:3n6              | 21061-10-9 | 2.00                | ± 0.011              |
| 29       | 51.27    | Methyl <i>cis</i> -13-docosenoate                   | C22:1n9              | 1120-34-9  | 2.00                | ± 0.011              |
| 30       | 51.60    | Methyl <i>cis</i> -11,14,17-eicosatrienoate         | C20:3n3              | 55682-88-7 | 2.00                | ± 0.011              |
| 31       | 51.83    | Methyl tricosanate                                  | C23:0                | 2433-97-8  | 2.00                | ± 0.011              |
| 32       | 51.92    | Methyl <i>cis</i> -5,8,11,14-eicosatetraenoate      | C20:4n6              | 2566-89-4  | 2.00                | ± 0.011              |
| 33       | 53.09    | Methyl <i>cis</i> -13,16-docosadienoate             | C22:2                | 61012-47-3 | 2.00                | ± 0.011              |
| 34       | 53.64    | Methyl tetracosanoate                               | C24:0                | 2442-49-1  | 4.00                | ± 0.021              |
| 35       | 54.20    | Methyl <i>cis</i> -5,8,11,14,17-eicosapentaenoate   | C20:5n3              | 2734-47-6  | 2.00                | ± 0.011              |
| 36       | 54.87    | Methyl <i>cis</i> -15-tetracosenoate                | C24:1n9              | 2733-88-2  | 2.00                | ± 0.011              |
| 37       | 59.66    | Methyl <i>cis</i> -4,7,10,13,16,19-docosahexaenoate | C22:6n3              | 2566-90-7  | 2.00                | ± 0.011              |

\* C18:2n6c : C18 fatty acid with 2 adjacent *cis* double bonds starting at C6 counting from the methyl group.

Table S2: Calculation of total fatty acids from GC-MS analysis on FAMES using an internal standard method (an example with FAMES from industrial chemical B)

| Peak No | RT (min) | Carbon :<br>Double Bond | R <sub>fi</sub> <sup>a</sup> | P <sub>ti</sub> | W <sub>FAMEi</sub> <sup>b</sup> | f <sub>FAi</sub> <sup>c</sup> | FA (%) | Normalized (%)    |
|---------|----------|-------------------------|------------------------------|-----------------|---------------------------------|-------------------------------|--------|-------------------|
| 5       | 25.5     | C11:0                   | -                            | 8,982,706       | -                               | 0.9300                        | -      | Internal Standard |
| 6       | 28.2     | C12:0                   | 1.0821                       | 4,125,829       | 0.4294                          | 0.9346                        | 2.56   | 2.62              |
| 8       | 33.4     | C14:0                   | 1.1433                       | 374,575         | 0.0369                          | 0.9421                        | 0.22   | 0.23              |
| 12      | 38.1     | C16:0                   | 1.1524                       | 7,761,990       | 0.7586                          | 0.9481                        | 4.58   | 4.69              |
| 16      | 42.5     | C18:0                   | 1.1921                       | 4,000,594       | 0.3780                          | 0.9530                        | 2.29   | 2.35              |
| 17      | 43.4     | C18:1n9t                | 1.1650                       | 1,260,657       | 0.1219                          | 0.9527                        | 0.74   | 0.76              |
| 18      | 43.8     | C18:1n9c                | 1.1982                       | 133,218,285     | 12.5225                         | 0.9527                        | 75.99  | 77.84             |
| 20      | 45.8     | C18:2n6c                | 1.1005                       | 18,095,281      | 1.8519                          | 0.9524                        | 11.23  | 11.51             |
| total   |          |                         |                              |                 |                                 |                               | 97.62  | 100               |

<sup>a,b</sup> R<sub>fi</sub> and W<sub>FAMEi</sub> were calculated according to the eqn (1) and (2), respectively.

<sup>b</sup> f<sub>FAi</sub> : Conversion factor (fatty acid methyl ester to the corresponding fatty acid)

$$W_{FAMEi} = \frac{P_{ti} * W_{IC11:0} * 1.0067}{P_{IC11:0} * R_{fi}} \dots\dots\dots\text{eqn (S1)}$$

W<sub>FAMEi</sub> : Content of each fatty acid methyl ester in test solution

P<sub>ti</sub> : Peak area of each fatty acid methyl ester in test solution

W<sub>IC11:0</sub> : Weight of internal standard (triundecanoin) added to test portion

1.0067 : Conversion of internal standard (triundecanoin) from triglyceride to FAME

P<sub>IC11:0</sub> : Peak area of internal standard (methyl undecanoate) in test solution

R<sub>fi</sub> : Response factor of each fatty acid methyl ester

$$R_{fi} = \frac{P_{Si} * W_{C11:0}}{P_{SC11:0} * W_i} \dots\dots\dots\text{eqn (S2)}$$

P<sub>Si</sub> : Peak area of each fatty acid methyl ester in standard solution

P<sub>SC11:0</sub> : Peak area of internal standard (methyl undecanoate) in standard solution

W<sub>C11:0</sub> : Weight of internal standard (methyl undecanoate) in standard solution (mg)

W<sub>i</sub> : Weight of each fatty acid methyl ester in standard solution (mg)

Table S3 : <sup>1</sup>H NMR data of (a) the hydrolysed products and (b) the methyl esterified products from fatty acids zinc salts.

## (a) Hydrolysed products from fatty acids zinc salts

| Peak No. | 1.Industrial Chemical A Hydrolyzed (in DMSO-d6) | 2.Industrial Chemical B Hydrolysed (in DMSO-d6) | Multiplicity      | Assignments                               |
|----------|-------------------------------------------------|-------------------------------------------------|-------------------|-------------------------------------------|
|          | Chemical shift, ppm (Integration)               |                                                 |                   |                                           |
| 1        | 0.85 (3.0)                                      | 0.85 (3.0)                                      | Triplet (J=8.0Hz) | Protons of terminal methyl                |
| 2        | 1.16-1.36 (22.6)                                | 1.18-1.36 (19.8)                                | Multiplet         | CH <sub>2</sub> of long chain alkyl       |
| 3        | 1.48 (2.0)                                      | 1.48 (2.1)                                      | Quintet (J=6.8Hz) | CH <sub>2</sub> of C3                     |
| 4        | 1.91-2.04 (2.1)                                 | 1.92-2.04 (3.6)                                 | Multiplet         | CH <sub>2</sub> -Allylic protons          |
| 5        | 2.17 (2.0)                                      | 2.17 (2.0)                                      | Triplet (J=7.6Hz) | CH <sub>2</sub> of C2 ( $\alpha$ to COOH) |
| 6        | 2.65-2.76 (0.19)                                | 2.66-2.77 (0.24)                                | Multiplet         | CH <sub>2</sub> -bis-allylic protons      |
| 7        | -                                               | -                                               | -                 | -                                         |
| 8        | 5.27-5.38 (1.2)                                 | 5.27-5.38 (2.0)                                 | Multiplet         | Olefinic protons                          |
| 9        | 11.94 (1.0)                                     | 11.94 (0.9)                                     | Singlet           | Proton of carboxyl acid                   |

## (b) Methyl esterified products from fatty acids zinc salts

| Peak No. | 1.Industrial Chemical A Methyl Esterified (in CDCl <sub>3</sub> ) | 2.Industrial Chemical B Methyl Esterified (in DMSO-d6 + CDCl <sub>3</sub> ) | Multiplicity      | Assignments                                              |
|----------|-------------------------------------------------------------------|-----------------------------------------------------------------------------|-------------------|----------------------------------------------------------|
|          | Chemical shift, ppm (Integration)                                 |                                                                             |                   |                                                          |
| 1        | 0.86 (3.0)                                                        | 0.85 (3.0)                                                                  | Triplet (J=8.0Hz) | Protons of terminal methyl                               |
| 2        | 1.15-1.36 (22.2)                                                  | 1.16-1.35 (19.8)                                                            | Multiplet         | CH <sub>2</sub> of long chain alkyl                      |
| 3        | 1.59 (2.0)                                                        | 1.51 (2.1)                                                                  | Quintet (J=6.8Hz) | CH <sub>2</sub> of C3                                    |
| 4        | 1.96-2.05 (2.0)                                                   | 1.92-2.03 (3.6)                                                             | Multiplet         | CH <sub>2</sub> -Allylic protons                         |
| 5        | 2.28 (2.0)                                                        | 2.26 (2.0)                                                                  | Triplet (J=7.6Hz) | CH <sub>2</sub> of C2 ( $\alpha$ to COOCH <sub>3</sub> ) |
| 6        | 2.56-2.87 (0.17)                                                  | 2.66-2.76 (0.23)                                                            | Multiplet         | CH <sub>2</sub> -bis-allylic protons                     |
| 7        | 3.64 (2.8)                                                        | 3.57 (3.0)                                                                  | Singlet           | Methoxy(OCH <sub>3</sub> ) protons                       |
| 8        | 5.27-5.39 (1.1)                                                   | 5.25-5.36 (2.0)                                                             | Multiplet         | Olefinic protons                                         |
| 9        | -                                                                 | -                                                                           | -                 | -                                                        |

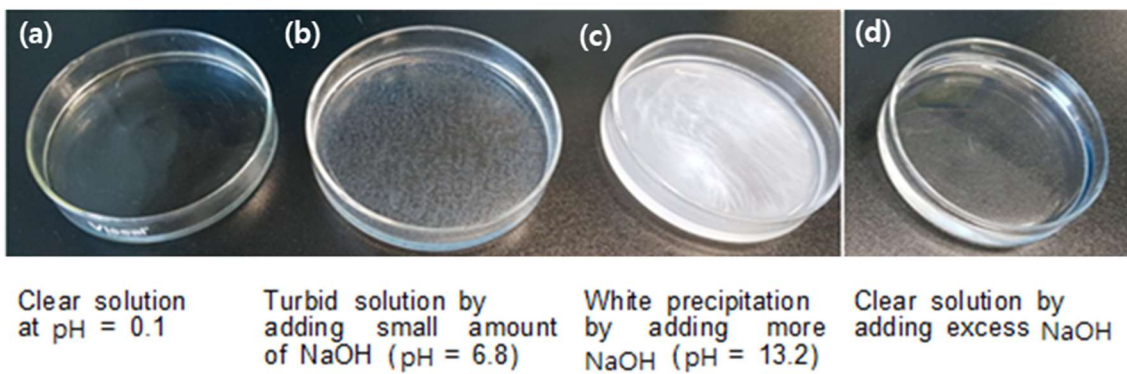

Picture S1: Pictures of white precipitation formed in a clear aqueous solution of aqueous work-up solution in 2.3.3.1 upon increase of alkalinity suggesting the formation of  $Zn(OH)_2$ .

The same phenomenon was observed in the aqueous work-up solutions in 2.3.1.
